# Supplementary material for: Tunable polarization properties of charge, spin, and valley in Janus VSiGeZ4 (Z = N, P, As) monolayers
Source: Royal Society of Chemistry journal article supplement (doi:10.1039/d3cp04889f), 2023-12-05
Supplement: d3cp04889f1.pdf [file d3cp04889f1.pdf]

## Supplemental Materials:

### Tunable polarization properties of charge, spin, and valley in Janus VSiGeZ<sub>4</sub> (Z= N, P, As) monolayers

Ming-Yang Liu<sup>1\*</sup>, Guang-Qiang Li<sup>1</sup>, Yao He<sup>2</sup>, and Kai Xiong<sup>3</sup>

<sup>1</sup>*Department of Physics and Electronic Science, Chuxiong Normal University,  
Chuxiong 675000, P. R. China*

<sup>2</sup>*Department of Physics, Yunnan University, Kunming 650091, P. R. China*

<sup>3</sup>*Materials Genome Institute, School of Materials and Energy, Yunnan University,  
Kunming 650091, P. R. China*

**\*Corresponding author: Ming-Yang Liu (E-mail: 18788549890@163.com)**

TABLE SI. The calculated elastic constants  $C_{ij}$  of VSi<sub>2</sub>Z<sub>4</sub>, VGe<sub>2</sub>Z<sub>4</sub>, and Janus VSiGeZ<sub>4</sub> in unit of N/m.

|                                  | $C_{11}$ | $C_{12}$ | $C_{66}$ |
|----------------------------------|----------|----------|----------|
| VSi <sub>2</sub> N <sub>4</sub>  | 509.186  | 154.833  | 177.176  |
| VSi <sub>2</sub> P <sub>4</sub>  | 207.034  | 47.595   | 79.720   |
| VSi <sub>2</sub> As <sub>4</sub> | 175.202  | 44.758   | 65.222   |
| VGe <sub>2</sub> N <sub>4</sub>  | 409.370  | 136.996  | 136.187  |
| VGe <sub>2</sub> P <sub>4</sub>  | 177.692  | 41.998   | 67.874   |
| VGe <sub>2</sub> As <sub>4</sub> | 142.668  | 54.071   | 44.298   |
| VSiGeN <sub>4</sub>              | 459.149  | 144.078  | 157.536  |
| VSiGeP <sub>4</sub>              | 194.442  | 57.213   | 68.614   |
| VSiGeAs <sub>4</sub>             | 155.385  | 45.645   | 54.870   |

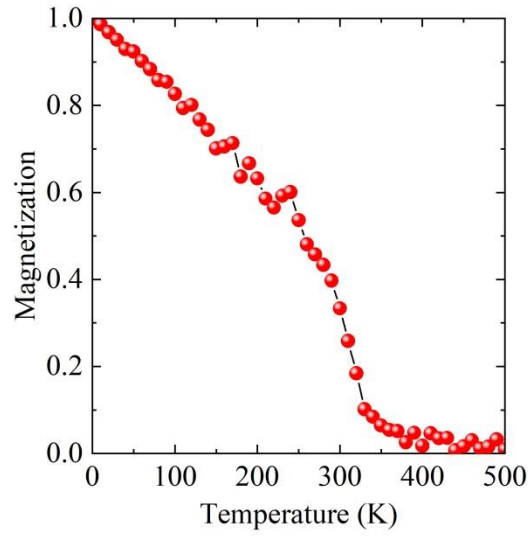

FIG. S1 The magnetization of VSiGeN<sub>4</sub> with temperature.

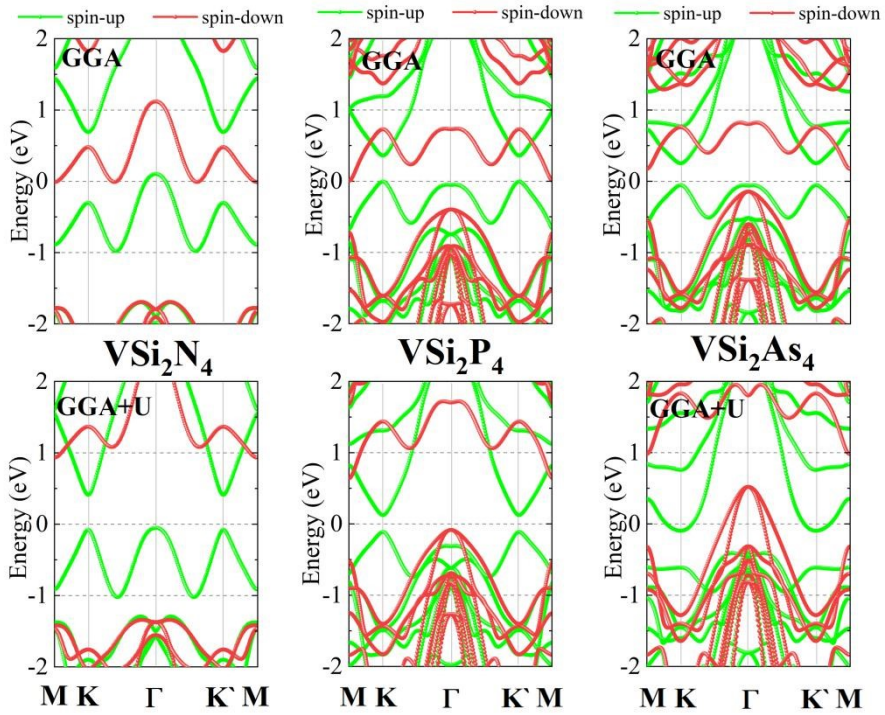

FIG. S2 Spin polarized band structure of VSi<sub>2</sub>Z<sub>4</sub> by using GGA and GGA+U methods.

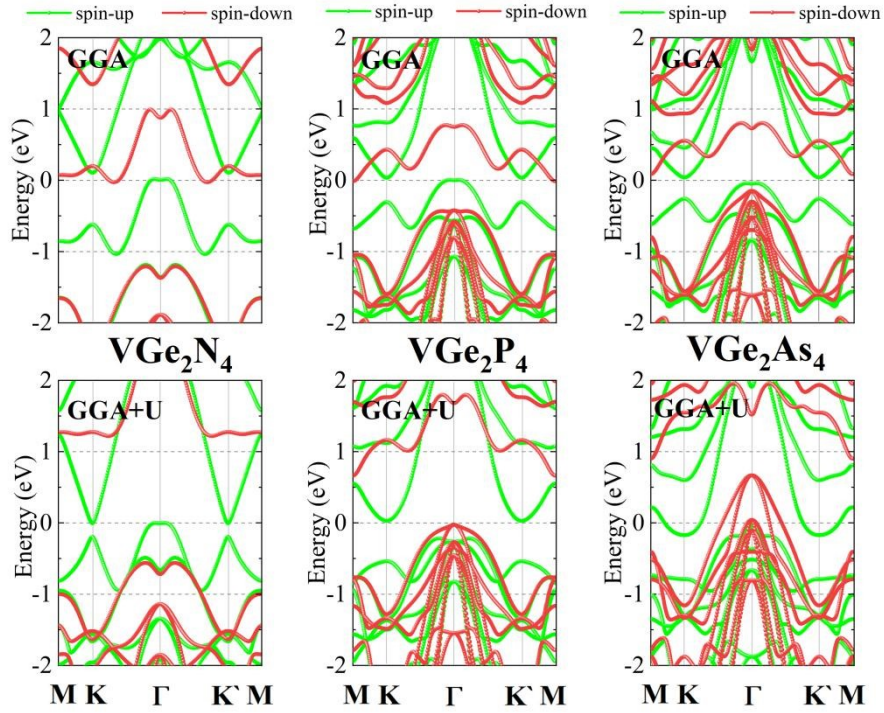

FIG.S3. Spin polarized band structure of  $VGe_2Z_4$  by using GGA and GGA+U methods.

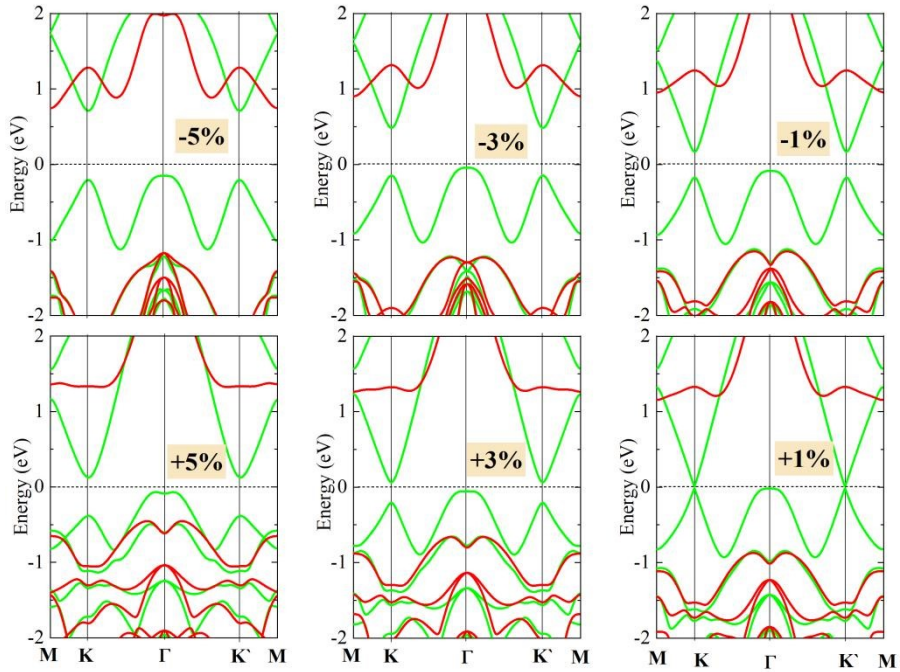

FIG. S4 Spin polarized band structure of the strained  $VSiGeN_4$ .

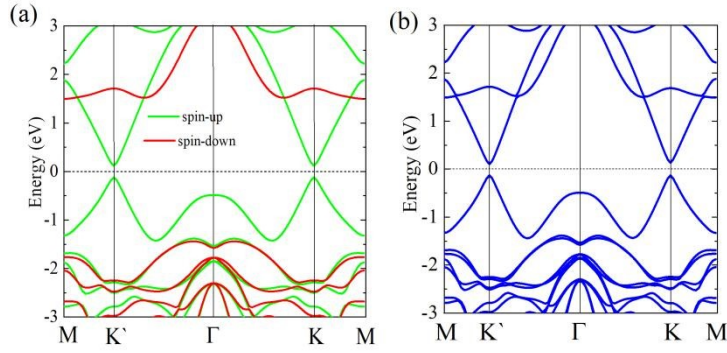

FIG. S5. (a) Spin polarized band structure and (b) band structure with SOC of the strained VSiGeN<sub>4</sub> by using HSE06 level.

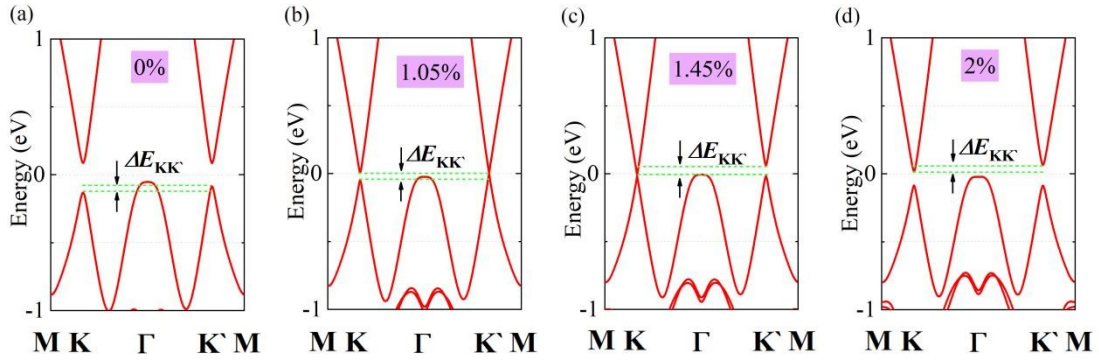

FIG. S6 Band structure of VSiGeN<sub>4</sub> under compressive strain  $\varepsilon = 0\%$ ,  $+1.05\%$ ,  $+1.45\%$ , and  $+2\%$ .

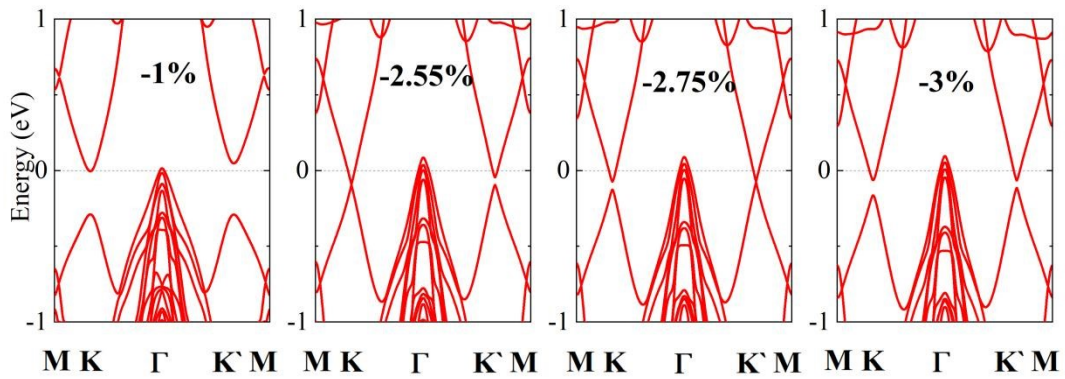

FIG. S7. Band structure of VSiGeP<sub>4</sub> under compressive strain  $\varepsilon = -1\%$ ,  $-2.55\%$ ,  $-2.75\%$ , and  $-3\%$ .
